# Supplementary material for: Competition and specialization in an African forest carnivore community
Source: PubMed Central journal article supplement (PMC6787825; doi:10.1002/ece3.5391), 2019-08-27
Supplement: ECE3-9-10092-s001.pdf [file ECE3-9-10092-s001.pdf]

# **Supplementary Information**

Mills et al. 2019

Competition and specialisation in an African forest carnivore community.

Supplementary Information 1. Station covariates recorded within 30 m × 30 m plots around each camera trap station during camera surveys in Kibale National Park, Uganda, in 2013–2014.

| Measure                                          | Abbreviation  | Units              | Description                                        |
|--------------------------------------------------|---------------|--------------------|----------------------------------------------------|
| <b>Large trees (DBH &gt; 10 cm)</b>              |               |                    |                                                    |
| Large stem density                               | lrgStemDens   | count/ha           | Raw count of large trees                           |
| Basal area                                       | BA            | m <sup>2</sup> /ha | Total area occupied by trees                       |
| Mean canopy height                               | mean.cnpy.hgt |                    |                                                    |
| Max canopy height                                | max.cnpy.hgt  | m                  | Canopy height above random small tree plots        |
| SD canopy height                                 | sd.cnpy.hgt   |                    |                                                    |
| Mean tree height                                 | mean.tree.hgt |                    |                                                    |
| Max tree height                                  | max.tree.hgt  | m                  | Individual tree heights                            |
| SD tree height                                   | sd.tree.hgt   |                    |                                                    |
| Mean large tree diameter                         | mean.dia      |                    |                                                    |
| Max large tree diameter                          | max.dia       | cm                 | Diameter at breast height                          |
| SD large tree diameter                           | sd.dia        |                    |                                                    |
| SD plot canopy height                            | sd.hgt.plot   |                    |                                                    |
| SD plot tree diameter                            | sd.dia.plot   | m                  | Variation between subplots                         |
| <b>Small trees (DBH &lt; 10 cm)</b>              |               |                    |                                                    |
| Small stem density                               | smStemDens    | no./ha             | Raw count of small trees                           |
| SD of small stem counts                          | sd.sm.stem    | no.                | Variation in small stem count                      |
| <b>Canopy cover</b>                              |               |                    |                                                    |
| Mean canopy cover                                | cnpy.mean     |                    |                                                    |
| Max canopy cover                                 | cnpy.max      | %                  | Canopy cover above small tree plots                |
| Min canopy cover                                 | cnpy.min      |                    |                                                    |
| SD canopy cover                                  | cnpy.sd       |                    |                                                    |
| Camera site canopy cover                         | cnpy.cam      | %                  | Canopy cover above camera                          |
| <b>Undergrowth</b>                               |               |                    |                                                    |
| Mean undergrowth density                         | ugd.mean      |                    |                                                    |
| Max undergrowth density                          | ugd.max       | %                  | Percent of red cloth hidden by vegetation          |
| Min undergrowth density                          | ugd.min       |                    |                                                    |
| SD undergrowth density                           | ugd.sd        |                    |                                                    |
| <b>Large tree species diversity and evenness</b> |               |                    |                                                    |
| Fisher's Alpha                                   | fisher.alpha  |                    |                                                    |
| Shannon's Diversity Index                        | shanon        |                    |                                                    |
| Pielou's Evenness Index                          | pielous       |                    |                                                    |
| <b>Trail width</b>                               |               |                    |                                                    |
| Mean trail width                                 | trl_w_mean    | cm                 | Width of all trails passing in front of the camera |
| Max trail width                                  | trl_w_all     |                    |                                                    |
| Season                                           | season        | wet / dry          | Whether the occasion fell in wet or dry season     |

Supplementary Information 2. Body measurements of all wild carnivore species detected in Kibale National Park, Uganda, 2013–2014.

| Species                      | Common                | Weight                     | mean HB |
|------------------------------|-----------------------|----------------------------|---------|
| <b>Canidae</b>               |                       |                            |         |
| <i>Canis adustus</i>         | Side-striped jackal   | ♀ 6.2–10 kg, ♂ 5.9–12 kg   | 75 cm   |
| <b>Felidae</b>               |                       |                            |         |
| <i>Caracal aurata</i>        | African golden cat    | ♀ 5.3–8.2 kg, ♂ 8–16 kg    | 80 cm   |
| <i>Leptailurus serval</i>    | Serval                | ♀ 6–12.5 kg, ♂ 7.9–18 kg   | 84 cm   |
| <b>Herpestidae</b>           |                       |                            |         |
| <i>Atilax paludinosus</i>    | Marsh mongoose        | 2.4–4.1 kg                 | 50 cm   |
| <i>Crossarchus alexandri</i> | Alexander's cusimanse | 1–2 kg                     | 45 cm   |
| <i>Herpestes sanguineus</i>  | Slender mongoose      | 0.37–0.79 kg               | 33 cm   |
| <i>Herpestes ichneumon</i>   | Large grey mongoose   | ♀ 2.2–4 kg, ♂ 2.6–4.1 kg   | 58 cm   |
| <i>Mungos mungo</i>          | Banded monogoose      | 0.9–1.9 kg                 | 37 cm   |
| <b>Mustelidae</b>            |                       |                            |         |
| <i>Aonyx congicus</i>        | Congo clawless otter  | 15–25 kg                   | 84 cm   |
| <i>Mellivora capensis</i>    | Honey badger          | ♀ 6.2–13 kg, ♂ 7.7–14.5 kg | 69 cm   |
| <b>Nandiniidae</b>           |                       |                            |         |
| <i>Nandinia binotata</i>     | African palm civet    | 1.2–3 kg                   | 50 cm   |
| <b>Viverridae</b>            |                       |                            |         |
| <i>Civettictis civetta</i>   | African civet         | 7–20 kg                    | 79 cm   |
| <i>Genetta maculata</i>      | Rusty-spotted genet   | ♀ 1.3–2.5 kg, ♂ 1.4–3.2 kg | 49 cm   |
| <i>Genetta servalina</i>     | Servaline genet       | 2.3–3 kg                   | 50 cm   |

Sources:

Hunter, L. & Barrett, P. (2011) Carnivores of the World. Princeton University Press, Princeton, NJ.

Jones, K.E., Bielby, J., Cardillo, M., Fritz, S.A., O'Dell, J., Orme, C.D.L., Safi, K., Sechrest, W., Boakes, E.H. & Carbone, C. (2009) PanTHERIA: a species-level database of life history, ecology, and geography of extant and recently extinct mammals. *Ecology*, 90, 2648-2648.

Kingdon, J. & Hoffmann, M. (2013) Mammals of Africa. Volume V: carnivores, pangolins, equids and rhinoceroses. Bloomsbury Publishing, London.

Supplementary Information 3. Ranked single-species single-season occupancy models for six carnivore species in Kibale National Park, Uganda. By convention, models with  $\Delta(Q)AIC < 2$  are equally supported, while Models with  $\Delta(Q)AIC < 6$  have some support (Richards, Whittingham & Stephens 2011). Therefore, we present equally supported occupancy models (plus the null occupancy model) for reference, while we use those with  $\Delta(Q)AIC < 6$  for model averaging (Table 3 in the main text). QAICc was used when overdispersion was indicated by a c-hat value  $> 1$ . Covariate abbreviations are available in Supplementary Information 1.

| Model                                                           | DF | logLik  | (Q)AICc | $\Delta(Q)AICc$ | weight | c-hat |
|-----------------------------------------------------------------|----|---------|---------|-----------------|--------|-------|
| <b>African golden cat</b>                                       |    |         |         |                 |        |       |
| psi(smStemDens), p(season + trail.max + ugd.mean)               | 6  | -451.48 | 915.75  | 0.00            | 0.530  | 1.00  |
| psi(lrgStemDens), p(season + trail.max + ugd.mean)              | 6  | -452.18 | 917.15  | 1.40            | 0.263  | 1.00  |
| psi(lrgStemDens + smStemDens), p(season + trail.max + ugd.mean) | 7  | -451.27 | 917.63  | 1.88            | 0.207  | 1.00  |
| psi(.), p(season + trail.max + ugd.mean)                        | 5  | -465.15 | 940.86  | 25.11           | 0.000  | 1.00  |
| <b>African civet</b>                                            |    |         |         |                 |        |       |
| psi(.), p(trail.max)                                            | 3  | -459.40 | 925.03  | 0.00            | 0.034  | 1.00  |
| psi.(cnpyhgt5.sd), p(trail.max)                                 | 4  | -458.50 | 925.37  | 0.34            | 0.029  | 1.00  |
| psi.(cnpyunder.mean), p(trail.max)                              | 4  | -459.10 | 926.59  | 1.56            | 0.016  | 1.00  |
| psi.(cnpyhgt5.mean), p(trail.max)                               | 4  | -459.19 | 926.77  | 1.74            | 0.014  | 1.00  |
| psi.(smStemDens), p(trail.max)                                  | 4  | -459.26 | 926.89  | 1.86            | 0.013  | 1.00  |
| psi.(sm.stem.sd), p(trail.max)                                  | 4  | -459.29 | 926.96  | 1.93            | 0.013  | 1.00  |
| <b>African palm civet</b>                                       |    |         |         |                 |        |       |
| psi(.), p(.)                                                    | 2  | -351.40 | 281.83  | 0.00            | 0.021  | 2.55  |
| psi.(cnpyhgt5.sd), p(.)                                         | 3  | -348.72 | 281.88  | 0.05            | 0.020  | 2.55  |
| psi.(Shannon), p(.)                                             | 3  | -349.76 | 282.69  | 0.87            | 0.014  | 2.55  |
| psi.(pielous), p(.)                                             | 3  | -349.95 | 282.84  | 1.01            | 0.013  | 2.55  |
| psi.(cnpyhgt5.sd + sm.stem.sd), p(.)                            | 4  | -347.21 | 282.89  | 1.06            | 0.012  | 2.55  |
| psi.(sm.stem.sd), p(.)                                          | 3  | -350.55 | 283.31  | 1.49            | 0.010  | 2.55  |
| psi.(cnpyhgt5.sd + Shannon), p(.)                               | 4  | -347.79 | 283.35  | 1.52            | 0.010  | 2.55  |

| Model                                                                   | DF | logLik  | (Q)AICc | $\Delta(Q)AICc$ | weight | c-hat |
|-------------------------------------------------------------------------|----|---------|---------|-----------------|--------|-------|
| psi.(lrgStemDens), p(.)                                                 | 3  | -350.70 | 283.43  | 1.60            | 0.009  | 2.55  |
| psi.(cnpyhgt5.sd + pielous), p(.)                                       | 4  | -347.96 | 283.48  | 1.65            | 0.009  | 2.55  |
| psi.(cnpyhgt5.sd + smStemDens), p(.)                                    | 4  | -348.22 | 283.68  | 1.85            | 0.008  | 2.55  |
| psi.(cnpyhgt5.mean), p(.)                                               | 3  | -351.03 | 283.69  | 1.86            | 0.008  | 2.55  |
| psi.(smStemDens), p(.)                                                  | 3  | -351.04 | 283.70  | 1.87            | 0.008  | 2.55  |
| psi.(cnpyhgt5.sd + lrgStemDens), p(.)                                   | 4  | -348.25 | 283.70  | 1.88            | 0.008  | 2.55  |
| <b>Servaline genet</b>                                                  |    |         |         |                 |        |       |
| psi.(lrgStemDens + Shannon), p(season + trail.max + ugd.mean)           | 7  | -741.68 | 1012.95 | 0.00            | 0.650  | 1.49  |
| psi.(.), p(season + trail.max + ugd.mean)                               | 5  | -753.84 | 1024.67 | 11.72           | 0.002  | 1.49  |
| <b>Rusty-spotted genet</b>                                              |    |         |         |                 |        |       |
| psi.(Shannon), p(trail.mean + ugd.mean)                                 | 5  | -462.35 | 831.12  | 0.00            | 0.979  | 1.13  |
| psi.(.), p(trail.mean + ugd.mean)                                       | 4  | -468.30 | 839.42  | 8.30            | 0.015  | 1.13  |
| <b>Marsh mongoose</b>                                                   |    |         |         |                 |        |       |
| psi.(smStemDens), p(season + trail.mean + ugd.mean)                     | 6  | -945.75 | 1904.31 | 0.00            | 0.150  | 1.00  |
| psi.(Shannon + smStemDens), p(season + trail.mean + ugd.mean)           | 7  | -944.78 | 1904.64 | 0.33            | 0.127  | 1.00  |
| psi.(cnpy.sd + Shannon), p(season + trail.mean + ugd.mean)              | 7  | -945.35 | 1905.77 | 1.46            | 0.072  | 1.00  |
| psi.(cnpy.sd + Shannon + smStemDens), p(season + trail.mean + ugd.mean) | 8  | -944.27 | 1905.94 | 1.63            | 0.066  | 1.00  |
| psi.(cnpy.sd + smStemDens), p(season + trail.mean + ugd.mean)           | 7  | -945.49 | 1906.05 | 1.74            | 0.063  | 1.00  |
| psi.(.), p(season + trail.mean + ugd.mean)                              | 5  | -950.59 | 1911.75 | 7.44            | 0.004  | 1.00  |

Supplementary Information 4. Activity period (95% isopleth) and core activity period (50% isopleth) of nine carnivore species in Kibale National Park, Uganda in 2013–2014. The best smoothing parameter ( $\kappa$ ) was individually calculated for each species.

| Species             | Independent photographs | K    | Activity range (hour intervals) |             |
|---------------------|-------------------------|------|---------------------------------|-------------|
|                     |                         |      | Kernel 50%                      | Kernel 95%  |
| African golden cat  | 201                     | 2.7  | 21:09–22:04<br>00:09–07:26      | 15:24–11:28 |
| Serval              | 36                      | 8.2  | 00:09–05:27                     | 15:56–09:58 |
| African civet       | 433                     | 8.4  | 20:06–00:56                     | 18:14–06:18 |
| African palm civet  | 137                     | 6.0  | 20:09–01:48                     | 18:02–07:07 |
| Servaline genet     | 520                     | 11.9 | 20:30–00:10<br>02:53–05:11      | 18:43–07:16 |
| Rusty-spotted genet | 713                     | 11.8 | 19:42–22:33<br>02:05–05:05      | 18:23–07:17 |
| Marsh mongoose      | 1796                    | 21.3 | 18:49–23:25<br>05:18–07:00      | 17:20–10:03 |
| Large grey mongoose | 37                      | 9.1  | 07:32–12:25<br>15:19–15:26      | 06:20–18:51 |
| Slender mongoose    | 48                      | 8.0  | 08:42–11:21<br>15:32–18:14      | 06:35–19:45 |

Supplementary Information 5a. Co-occurrence occupancy models describing interactions between African civets (species B) and African golden cats (species A). The best models for all species included the most significant covariates from single-species single-season occupancy models. Covariate abbreviations are explained in Supplementary Information 1. Parameters are explained in the Methods. Models are constructed to test whether parameters of interest equal (=) or not equal (!=) to each other. The best model was selected based on AIC.

| <b>African golden cat – African civet models</b>                                                                                | <b>AIC</b> | <b>ΔAIC</b> | <b>AIC weight</b> | <b>Model Lik.</b> | <b>no. param.</b> | <b>-2LogLik</b> |
|---------------------------------------------------------------------------------------------------------------------------------|------------|-------------|-------------------|-------------------|-------------------|-----------------|
| ( $\Psi_A$ )cnp <sub>py</sub> +smstem, ( $\Psi_{BA} \neq \Psi_{Ba}$ ), ( $p_A = r_A$ , $p_B \neq r_{Ba} \neq r_{BA}$ )trail+ugd | 3890.63    | 0           | 0.6341            | 1                 | 17                | 3856.63         |
| ( $\Psi_A$ )cnp <sub>py</sub> +smstem, ( $\Psi_{BA} = \Psi_{Ba}$ ), ( $p_A = r_A$ , $p_B \neq r_{Ba} \neq r_{BA}$ )trail+ugd    | 3891.73    | 1.1         | 0.3659            | 0.5769            | 16                | 3859.73         |
| ( $\Psi_A$ )cnp <sub>py</sub> +smstem, ( $\Psi_{BA} = \Psi_{Ba}$ ), ( $p_A = r_A$ , $p_B \neq r_{Ba} = r_{BA}$ )trail+ugd       | 3969.07    | 78.44       | 0                 | 0                 | 13                | 3943.07         |
| ( $\Psi_A$ )cnp <sub>py</sub> +smstem, ( $\Psi_{BA} \neq \Psi_{Ba}$ ), ( $p_A = r_A$ , $p_B \neq r_{Ba} = r_{BA}$ )trail+ugd    | 4022.31    | 131.68      | 0                 | 0                 | 14                | 3994.31         |
| ( $\Psi_A$ )cnp <sub>py</sub> +smstem, ( $\Psi_{BA} \neq \Psi_{Ba}$ ), ( $p_A = r_A$ , $p_B = r_{Ba} = r_{BA}$ )trail+ugd       | 4098.75    | 208.12      | 0                 | 0                 | 11                | 4076.75         |
| ( $\Psi_A$ )cnp <sub>py</sub> +smstem, ( $\Psi_{BA} = \Psi_{Ba}$ ), ( $p_A = r_A$ , $p_B = r_{Ba} = r_{BA}$ )trail+ugd          | 4099.84    | 209.21      | 0                 | 0                 | 10                | 4079.84         |
| $\Psi_A$ , $\Psi_{BA} \neq \Psi_{Ba}$ , $p_A = r_A$ , $p_B \neq r_{Ba} \neq r_{BA}$                                             | 4100.31    | 209.68      | 0                 | 0                 | 7                 | 4086.31         |
| ( $\Psi_A$ )cnp <sub>py</sub> +smstem, ( $\Psi_{BA} \neq \Psi_{Ba}$ ), ( $p_A = r_A$ , $p_B = r_{Ba} \neq r_{BA}$ )trail+ugd    | 4101.7     | 211.07      | 0                 | 0                 | 14                | 4073.7          |
| ( $\Psi_A$ )cnp <sub>py</sub> +smstem, ( $\Psi_{BA} = \Psi_{Ba}$ ), ( $p_A = r_A$ , $p_B = r_{Ba} \neq r_{BA}$ )trail+ugd       | 4102.8     | 212.17      | 0                 | 0                 | 13                | 4076.8          |
| $\Psi_A$ , $\Psi_{BA} = \Psi_{Ba}$ , $p_A = r_A$ , $p_B \neq r_{Ba} \neq r_{BA}$                                                | 4122.61    | 231.98      | 0                 | 0                 | 6                 | 4110.61         |
| $\Psi_A$ , $\Psi_{BA} \neq \Psi_{Ba}$ , $p_A = r_A$ , $p_B = r_{Ba} = r_{BA}$                                                   | 4253.76    | 363.13      | 0                 | 0                 | 5                 | 4243.76         |
| $\Psi_A$ , $\Psi_{BA} \neq \Psi_{Ba}$ , $p_A = r_A$ , $p_B = r_{Ba} \neq r_{BA}$                                                | 4255.75    | 365.12      | 0                 | 0                 | 6                 | 4243.75         |
| $\Psi_A$ , $\Psi_{BA} = \Psi_{Ba}$ , $p_A = r_A$ , $p_B = r_{Ba} = r_{BA}$                                                      | 4256.45    | 365.82      | 0                 | 0                 | 4                 | 4248.45         |
| $\Psi_A$ , $\Psi_{BA} = \Psi_{Ba}$ , $p_A = r_A$ , $p_B = r_{Ba} \neq r_{BA}$                                                   | 4258.45    | 367.82      | 0                 | 0                 | 5                 | 4248.45         |
| $\Psi_A$ , $\Psi_{BA} = \Psi_{Ba}$ , $p_A = r_A$ , $p_B \neq r_{Ba} = r_{BA}$                                                   | 4314.87    | 424.24      | 0                 | 0                 | 5                 | 4304.87         |
| $\Psi_A$ , $\Psi_{BA} \neq \Psi_{Ba}$ , $p_A = r_A$ , $p_B \neq r_{Ba} = r_{BA}$                                                | 4316.87    | 426.24      | 0                 | 0                 | 6                 | 4304.87         |

Supplementary Information 5b. Co-occurrence occupancy models describing interactions between African palm civets (species B) and African golden cats (species A). The best models for all species included the most significant covariates from single-species single-season occupancy models. Covariate abbreviations are explained in Supplementary Information 1. Parameters are explained in the Methods. Models are constructed to test whether parameters of interest equal (=) or not equal (!=) to each other. The best model was selected based on AIC.

| <b>African golden cat – African palm civet models</b>                                                                | <b>AIC</b> | <b>ΔAIC</b> | <b>AIC weight</b> | <b>Model Lik.</b> | <b>no. param.</b> | <b>-2LogLik</b> |
|----------------------------------------------------------------------------------------------------------------------|------------|-------------|-------------------|-------------------|-------------------|-----------------|
| ( $\Psi_A$ )cnpysmstem, ( $\Psi_{BA} = \Psi_{Ba}$ )ch5sd, ( $p_A = r_A, p_B = r_{Ba} \neq r_{BA}$ )trail + ugd       | 2812.13    | 0           | 0.4113            | 1                 | 14                | 2784.13         |
| ( $\Psi_A$ )cnpysmstem, ( $\Psi_{BA} = \Psi_{Ba}$ )ch5sd, ( $p_A = r_A, p_B = r_{Ba} = r_{BA}$ )trail + ugd          | 2812.34    | 0.21        | 0.3703            | 0.9003            | 11                | 2790.34         |
| ( $\Psi_A$ )cnpysmstem, ( $\Psi_{BA} \neq \Psi_{Ba}$ )ch5sd, ( $p_A = r_A, p_B = r_{Ba} = r_{BA}$ )trail + ugd       | 2813.43    | 1.3         | 0.2147            | 0.522             | 13                | 2787.43         |
| ( $\Psi_A$ )cnpysmstem, ( $\Psi_{BA} \neq \Psi_{Ba}$ )ch5sd, ( $p_A = r_A, p_B = r_{Ba} \neq r_{BA}$ )trail + ugd    | 2821.58    | 9.45        | 0.0036            | 0.0089            | 16                | 2789.58         |
| ( $\Psi_A$ )cnpysmstem, ( $\Psi_{BA} \neq \Psi_{Ba}$ )ch5sd, ( $p_A = r_A, p_B \neq r_{Ba} = r_{BA}$ )trail + ugd    | 2835.57    | 23.44       | 0                 | 0                 | 16                | 2803.57         |
| ( $\Psi_A$ )cnpysmstem, ( $\Psi_{BA} = \Psi_{Ba}$ )ch5sd, ( $p_A = r_A, p_B \neq r_{Ba} = r_{BA}$ )trail + ugd       | 2837.68    | 25.55       | 0                 | 0                 | 14                | 2809.68         |
| ( $\Psi_A$ )cnpysmstem, ( $\Psi_{BA} = \Psi_{Ba}$ )ch5sd, ( $p_A = r_A, p_B \neq r_{Ba} \neq r_{BA}$ )trail + ugd    | 2851.76    | 39.63       | 0                 | 0                 | 17                | 2817.76         |
| ( $\Psi_A$ )cnpysmstem, ( $\Psi_{BA} \neq \Psi_{Ba}$ )ch5sd, ( $p_A = r_A, p_B \neq r_{Ba} \neq r_{BA}$ )trail + ugd | 2852.43    | 40.3        | 0                 | 0                 | 19                | 2814.43         |
| $\Psi_A, \Psi_{BA} = \Psi_{Ba}, p_A = r_A, p_B \neq r_{Ba} = r_{BA}$                                                 | 2894.02    | 81.89       | 0                 | 0                 | 5                 | 2884.02         |
| $\Psi_A, \Psi_{BA} = \Psi_{Ba}, p_A = r_A, p_B = r_{Ba} = r_{BA}$                                                    | 2895.02    | 82.89       | 0                 | 0                 | 4                 | 2887.02         |
| $\Psi_A, \Psi_{BA} \neq \Psi_{Ba}, p_A = r_A, p_B \neq r_{Ba} = r_{BA}$                                              | 2895.25    | 83.12       | 0                 | 0                 | 6                 | 2883.25         |
| $\Psi_A, \Psi_{BA} = \Psi_{Ba}, p_A = r_A, p_B \neq r_{Ba} \neq r_{BA}$                                              | 2895.4     | 83.27       | 0                 | 0                 | 6                 | 2883.4          |
| $\Psi_A, \Psi_{BA} = \Psi_{Ba}, p_A = r_A, p_B = r_{Ba} \neq r_{BA}$                                                 | 2896.13    | 84          | 0                 | 0                 | 5                 | 2886.13         |
| $\Psi_A, \Psi_{BA} \neq \Psi_{Ba}, p_A = r_A, p_B = r_{Ba} = r_{BA}$                                                 | 2896.98    | 84.85       | 0                 | 0                 | 5                 | 2886.98         |
| $\Psi_A, \Psi_{BA} \neq \Psi_{Ba}, p_A = r_A, p_B = r_{Ba} \neq r_{BA}$                                              | 2898.08    | 85.95       | 0                 | 0                 | 6                 | 2886.08         |
| $\Psi_A, \Psi_{BA} \neq \Psi_{Ba}, p_A = r_A, p_B \neq r_{Ba} \neq r_{BA}$                                           | 2912.1     | 99.97       | 0                 | 0                 | 7                 | 2898.1          |



Supplementary Information 5c. Co-occurrence occupancy models describing interactions between servaline genet (species B) and African golden cats (species A). The best models for all species included the most significant covariates from single-species single-season occupancy models. Covariate abbreviations are explained in Supplementary Information 1. Parameters are explained in the Methods. Models are constructed to test whether parameters of interest equal (=) or not equal (!=) to each other. The best model was selected based on AIC.

| <b>African golden cat – servaline genet models</b>                                                                             | <b>AIC</b> | <b>ΔAIC</b> | <b>AIC weight</b> | <b>Model Lik.</b> | <b>no. param.</b> | <b>-2LogLik</b> |
|--------------------------------------------------------------------------------------------------------------------------------|------------|-------------|-------------------|-------------------|-------------------|-----------------|
| ( $\Psi_A$ )cnpysmstem, ( $\Psi_{BA} \neq \Psi_{Ba}$ )lgstem+shannon, ( $p_A = r_A$ , $p_B \neq r_{Ba} \neq r_{BA}$ )trail+ugd | 5059.06    | 0           | 0.9995            | 1                 | 21                | 5017.06         |
| ( $\Psi_A$ )cnpysmstem, ( $\Psi_{BA} = \Psi_{Ba}$ )lgstem+shannon, ( $p_A = r_A$ , $p_B = r_{Ba} = r_{BA}$ )trail+ugd          | 5074.45    | 15.39       | 0.0005            | 0.0005            | 12                | 5050.45         |
| ( $\Psi_A$ )cnpysmstem, ( $\Psi_{BA} \neq \Psi_{Ba}$ )lgstem+shannon, ( $p_A = r_A$ , $p_B = r_{Ba} = r_{BA}$ )trail+ugd       | 5079.22    | 20.16       | 0                 | 0                 | 15                | 5049.22         |
| ( $\Psi_A$ )cnpysmstem, ( $\Psi_{BA} \neq \Psi_{Ba}$ )lgstem+shannon, ( $p_A = r_A$ , $p_B = r_{Ba} \neq r_{BA}$ )trail+ugd    | 5083.51    | 24.45       | 0                 | 0                 | 18                | 5047.51         |
| ( $\Psi_A$ )cnpysmstem, ( $\Psi_{BA} = \Psi_{Ba}$ )lgstem+shannon, ( $p_A = r_A$ , $p_B \neq r_{Ba} = r_{BA}$ )trail+ugd       | 5108.39    | 49.33       | 0                 | 0                 | 15                | 5078.39         |
| ( $\Psi_A$ )cnpysmstem, ( $\Psi_{BA} = \Psi_{Ba}$ )lgstem+shannon, ( $p_A = r_A$ , $p_B \neq r_{Ba} \neq r_{BA}$ )trail+ugd    | 5113.4     | 54.34       | 0                 | 0                 | 18                | 5077.4          |
| ( $\Psi_A$ )cnpysmstem, ( $\Psi_{BA} \neq \Psi_{Ba}$ )lgstem+shannon, ( $p_A = r_A$ , $p_B \neq r_{Ba} = r_{BA}$ )trail+ugd    | 5116.46    | 57.4        | 0                 | 0                 | 18                | 5080.46         |
| $\Psi_A$ , $\Psi_{BA} = \Psi_{Ba}$ , $p_A = r_A$ , $p_B \neq r_{Ba} = r_{BA}$                                                  | 5130.53    | 71.47       | 0                 | 0                 | 5                 | 5120.53         |
| $\Psi_A$ , $\Psi_{BA} = \Psi_{Ba}$ , $p_A = r_A$ , $p_B \neq r_{Ba} \neq r_{BA}$                                               | 5131.95    | 72.89       | 0                 | 0                 | 7                 | 5117.95         |
| $\Psi_A$ , $\Psi_{BA} \neq \Psi_{Ba}$ , $p_A = r_A$ , $p_B \neq r_{Ba} = r_{BA}$                                               | 5132.06    | 73          | 0                 | 0                 | 6                 | 5120.06         |
| $\Psi_A$ , $\Psi_{BA} \neq \Psi_{Ba}$ , $p_A = r_A$ , $p_B \neq r_{Ba} \neq r_{BA}$                                            | 5133.63    | 74.57       | 0                 | 0                 | 8                 | 5117.63         |
| ( $\Psi_A$ )cnpysmstem, ( $\Psi_{BA} = \Psi_{Ba}$ )lgstem+shannon, ( $p_A = r_A$ , $p_B = r_{Ba} \neq r_{BA}$ )trail+ugd       | 5144.2     | 85.14       | 0                 | 0                 | 15                | 5114.2          |
| $\Psi_A$ , $\Psi_{BA} \neq \Psi_{Ba}$ , $p_A = r_A$ , $p_B = r_{Ba} \neq r_{BA}$                                               | 5164.32    | 105.26      | 0                 | 0                 | 6                 | 5152.32         |
| $\Psi_A$ , $\Psi_{BA} \neq \Psi_{Ba}$ , $p_A = r_A$ , $p_B = r_{Ba} = r_{BA}$                                                  | 5177.2     | 118.14      | 0                 | 0                 | 5                 | 5167.2          |
| $\Psi_A$ , $\Psi_{BA} = \Psi_{Ba}$ , $p_A = r_A$ , $p_B = r_{Ba} \neq r_{BA}$                                                  | 5229.64    | 170.58      | 0                 | 0                 | 5                 | 5219.64         |
| $\Psi_A$ , $\Psi_{BA} = \Psi_{Ba}$ , $p_A = r_A$ , $p_B = r_{Ba} = r_{BA}$                                                     | 5264.06    | 205         | 0                 | 0                 | 4                 | 5256.06         |

Supplementary Information 5d. Co-occurrence occupancy models describing interactions between rusty-spotted genet (species B) and African golden cats (species A). The best models for all species included the most significant covariates from single-species single-season occupancy models. Covariate abbreviations are explained in Supplementary Information 1. Parameters are explained in the Methods. Models are constructed to test whether parameters of interest equal (=) or not equal (!=) to each other. The best model was selected based on AIC.

| <b>African golden cat – rusty-spotted genet models</b>                                                                                    | <b>AIC</b> | <b>ΔAIC</b> | <b>AIC weight</b> | <b>Model Lik.</b> | <b>no. param.</b> | <b>-2LogLik</b> |
|-------------------------------------------------------------------------------------------------------------------------------------------|------------|-------------|-------------------|-------------------|-------------------|-----------------|
| ( $\Psi_A$ )cnp <sub>y</sub> +smstem, ( $\Psi_{BA} \neq \Psi_{Ba}$ ) shannon, ( $p_A = r_A$ , $p_B \neq r_{Ba} \neq r_{BA}$ ) trail + ugd | 4252.07    | 0           | 0.8249            | 1                 | 19                | 4214.07         |
| ( $\Psi_A$ )cnp <sub>y</sub> +smstem, ( $\Psi_{BA} = \Psi_{Ba}$ ) shannon, ( $p_A = r_A$ , $p_B \neq r_{Ba} \neq r_{BA}$ ) trail + ugd    | 4255.17    | 3.1         | 0.1751            | 0.2122            | 17                | 4221.17         |
| ( $\Psi_A$ )cnp <sub>y</sub> +smstem, ( $\Psi_{BA} \neq \Psi_{Ba}$ ) shannon, ( $p_A = r_A$ , $p_B \neq r_{Ba} = r_{BA}$ ) trail + ugd    | 4281.42    | 29.35       | 0                 | 0                 | 16                | 4249.42         |
| ( $\Psi_A$ )cnp <sub>y</sub> +smstem, ( $\Psi_{BA} = \Psi_{Ba}$ ) shannon, ( $p_A = r_A$ , $p_B \neq r_{Ba} = r_{BA}$ ) trail + ugd       | 4289.05    | 36.98       | 0                 | 0                 | 14                | 4261.05         |
| ( $\Psi_A$ )cnp <sub>y</sub> +smstem, ( $\Psi_{BA} = \Psi_{Ba}$ ) shannon, ( $p_A = r_A$ , $p_B = r_{Ba} = r_{BA}$ ) trail + ugd          | 4361.66    | 109.59      | 0                 | 0                 | 11                | 4339.66         |
| ( $\Psi_A$ )cnp <sub>y</sub> +smstem, ( $\Psi_{BA} \neq \Psi_{Ba}$ ) shannon, ( $p_A = r_A$ , $p_B = r_{Ba} = r_{BA}$ ) trail + ugd       | 4362.24    | 110.17      | 0                 | 0                 | 13                | 4336.24         |
| ( $\Psi_A$ )cnp <sub>y</sub> +smstem, ( $\Psi_{BA} = \Psi_{Ba}$ ) shannon, ( $p_A = r_A$ , $p_B = r_{Ba} \neq r_{BA}$ ) trail + ugd       | 4365.74    | 113.67      | 0                 | 0                 | 14                | 4337.74         |
| ( $\Psi_A$ )cnp <sub>y</sub> +smstem, ( $\Psi_{BA} \neq \Psi_{Ba}$ ) shannon, ( $p_A = r_A$ , $p_B = r_{Ba} \neq r_{BA}$ ) trail + ugd    | 4433.1     | 181.03      | 0                 | 0                 | 16                | 4401.1          |
| $\Psi_A$ , $\Psi_{BA} = \Psi_{Ba}$ , $p_A = r_A$ , $p_B \neq r_{Ba} = r_{BA}$                                                             | 4684.57    | 432.5       | 0                 | 0                 | 5                 | 4674.57         |
| $\Psi_A$ , $\Psi_{BA} \neq \Psi_{Ba}$ , $p_A = r_A$ , $p_B \neq r_{Ba} = r_{BA}$                                                          | 4686.57    | 434.5       | 0                 | 0                 | 6                 | 4674.57         |
| $\Psi_A$ , $\Psi_{BA} \neq \Psi_{Ba}$ , $p_A = r_A$ , $p_B \neq r_{Ba} \neq r_{BA}$                                                       | 4731.03    | 478.96      | 0                 | 0                 | 7                 | 4717.03         |
| $\Psi_A$ , $\Psi_{BA} = \Psi_{Ba}$ , $p_A = r_A$ , $p_B \neq r_{Ba} \neq r_{BA}$                                                          | 4741.01    | 488.94      | 0                 | 0                 | 6                 | 4729.01         |
| $\Psi_A$ , $\Psi_{BA} = \Psi_{Ba}$ , $p_A = r_A$ , $p_B = r_{Ba} \neq r_{BA}$                                                             | 4793.95    | 541.88      | 0                 | 0                 | 5                 | 4783.95         |
| $\Psi_A$ , $\Psi_{BA} \neq \Psi_{Ba}$ , $p_A = r_A$ , $p_B = r_{Ba} \neq r_{BA}$                                                          | 4795.91    | 543.84      | 0                 | 0                 | 6                 | 4783.91         |
| $\Psi_A$ , $\Psi_{BA} = \Psi_{Ba}$ , $p_A = r_A$ , $p_B = r_{Ba} = r_{BA}$                                                                | 4796.21    | 544.14      | 0                 | 0                 | 4                 | 4788.21         |
| $\Psi_A$ , $\Psi_{BA} \neq \Psi_{Ba}$ , $p_A = r_A$ , $p_B = r_{Ba} = r_{BA}$                                                             | 4798.17    | 546.1       | 0                 | 0                 | 5                 | 4788.17         |

Supplementary Information 5e. Co-occurrence occupancy models describing interactions between marsh mongooses (species B) and African golden cats (species A). The best models for all species included the most significant covariates from single-species single-season occupancy models. Covariate abbreviations are explained in Supplementary Information 1. Parameters are explained in the Methods. Models are constructed to test whether parameters of interest equal (=) or not equal (!=) to each other. The best model was selected based on AIC.

| <b>African golden cat – marsh mongoose models</b>                                                                      | <b>AIC</b> | <b>ΔAIC</b> | <b>AIC weight</b> | <b>Model Lik.</b> | <b>no. param.</b> | <b>-2LogLik</b> |
|------------------------------------------------------------------------------------------------------------------------|------------|-------------|-------------------|-------------------|-------------------|-----------------|
| ( $\Psi_A$ )cnpysmstem, ( $\Psi_{BA} = \Psi_{Ba}$ )smstem, ( $p_A = r_A$ , $p_B \neq r_{Ba} = r_{BA}$ )trail+ugd       | 8806.37    | 0           | 0.673             | 1                 | 14                | 8778.37         |
| ( $\Psi_A$ )cnpysmstem, ( $\Psi_{BA} \neq \Psi_{Ba}$ )smstem, ( $p_A = r_A$ , $p_B \neq r_{Ba} = r_{BA}$ )trail+ugd    | 8808.11    | 1.74        | 0.282             | 0.419             | 16                | 8776.11         |
| ( $\Psi_A$ )cnpysmstem, ( $\Psi_{BA} \neq \Psi_{Ba}$ )smstem, ( $p_A = r_A$ , $p_B \neq r_{Ba} \neq r_{BA}$ )trail+ugd | 8811.78    | 5.41        | 0.045             | 0.0669            | 19                | 8773.78         |
| ( $\Psi_A$ )cnpysmstem, ( $\Psi_{BA} = \Psi_{Ba}$ )smstem, ( $p_A = r_A$ , $p_B \neq r_{Ba} \neq r_{BA}$ )trail+ugd    | 8857.15    | 50.78       | 0                 | 0                 | 17                | 8823.15         |
| $\Psi_A$ , $\Psi_{BA} \neq \Psi_{Ba}$ , $p_A = r_A$ , $p_B \neq r_{Ba} = r_{BA}$                                       | 8952.51    | 146.14      | 0                 | 0                 | 6                 | 8940.51         |
| $\Psi_A$ , $\Psi_{BA} = \Psi_{Ba}$ , $p_A = r_A$ , $p_B \neq r_{Ba} = r_{BA}$                                          | 8962.12    | 155.75      | 0                 | 0                 | 5                 | 8952.12         |
| ( $\Psi_A$ )cnpysmstem, ( $\Psi_{BA} = \Psi_{Ba}$ )smstem, ( $p_A = r_A$ , $p_B = r_{Ba} \neq r_{BA}$ )trail+ugd       | 8982.27    | 175.9       | 0                 | 0                 | 14                | 8954.27         |
| ( $\Psi_A$ )cnpysmstem, ( $\Psi_{BA} \neq \Psi_{Ba}$ )smstem, ( $p_A = r_A$ , $p_B = r_{Ba} \neq r_{BA}$ )trail+ugd    | 8982.96    | 176.59      | 0                 | 0                 | 16                | 8950.96         |
| ( $\Psi_A$ )cnpysmstem, ( $\Psi_{BA} = \Psi_{Ba}$ )smstem, ( $p_A = r_A$ , $p_B = r_{Ba} = r_{BA}$ )trail+ugd          | 8983.93    | 177.56      | 0                 | 0                 | 11                | 8961.93         |
| ( $\Psi_A$ )cnpysmstem, ( $\Psi_{BA} \neq \Psi_{Ba}$ )smstem, ( $p_A = r_A$ , $p_B = r_{Ba} = r_{BA}$ )trail+ugd       | 8984.6     | 178.23      | 0                 | 0                 | 13                | 8958.6          |
| $\Psi_A$ , $\Psi_{BA} \neq \Psi_{Ba}$ , $p_A = r_A$ , $p_B \neq r_{Ba} \neq r_{BA}$                                    | 8996.01    | 189.64      | 0                 | 0                 | 7                 | 8982.01         |
| $\Psi_A$ , $\Psi_{BA} = \Psi_{Ba}$ , $p_A = r_A$ , $p_B \neq r_{Ba} \neq r_{BA}$                                       | 9011.58    | 205.21      | 0                 | 0                 | 6                 | 8999.58         |
| $\Psi_A$ , $\Psi_{BA} \neq \Psi_{Ba}$ , $p_A = r_A$ , $p_B = r_{Ba} = r_{BA}$                                          | 9149.68    | 343.31      | 0                 | 0                 | 5                 | 9139.68         |
| $\Psi_A$ , $\Psi_{BA} \neq \Psi_{Ba}$ , $p_A = r_A$ , $p_B = r_{Ba} \neq r_{BA}$                                       | 9151.06    | 344.69      | 0                 | 0                 | 6                 | 9139.06         |
| $\Psi_A$ , $\Psi_{BA} = \Psi_{Ba}$ , $p_A = r_A$ , $p_B = r_{Ba} = r_{BA}$                                             | 9156.55    | 350.18      | 0                 | 0                 | 4                 | 9148.55         |
| $\Psi_A$ , $\Psi_{BA} = \Psi_{Ba}$ , $p_A = r_A$ , $p_B = r_{Ba} \neq r_{BA}$                                          | 9157.93    | 351.56      | 0                 | 0                 | 5                 | 9147.93         |
